# Supplementary material for: Investigating Determinants and Evaluating Deep Learning Training Approaches for Visual Acuity in Foveal Hypoplasia
Source: PubMed Central journal article supplement — Ophthalmol Sci. 2022 Sep 24;3(1):100225. doi: 10.1016/j.xops.2022.100225 (PMC9634033; doi:10.1016/j.xops.2022.100225), 2022-09-24

**Supplemental figure 1.** Visual acuity of individuals with albinism spectrum disorder by foveal hypoplasia grade (A), nystagmus (B), and spherical equivalent refractive error (C). LogMAR = logarithm of the minimal angle of resolution; ns = not significant. \* $P \leq 0.05$ ; \*\* $P \leq 0.01$ ; \*\*\*\* $P \leq 0.0001$ .

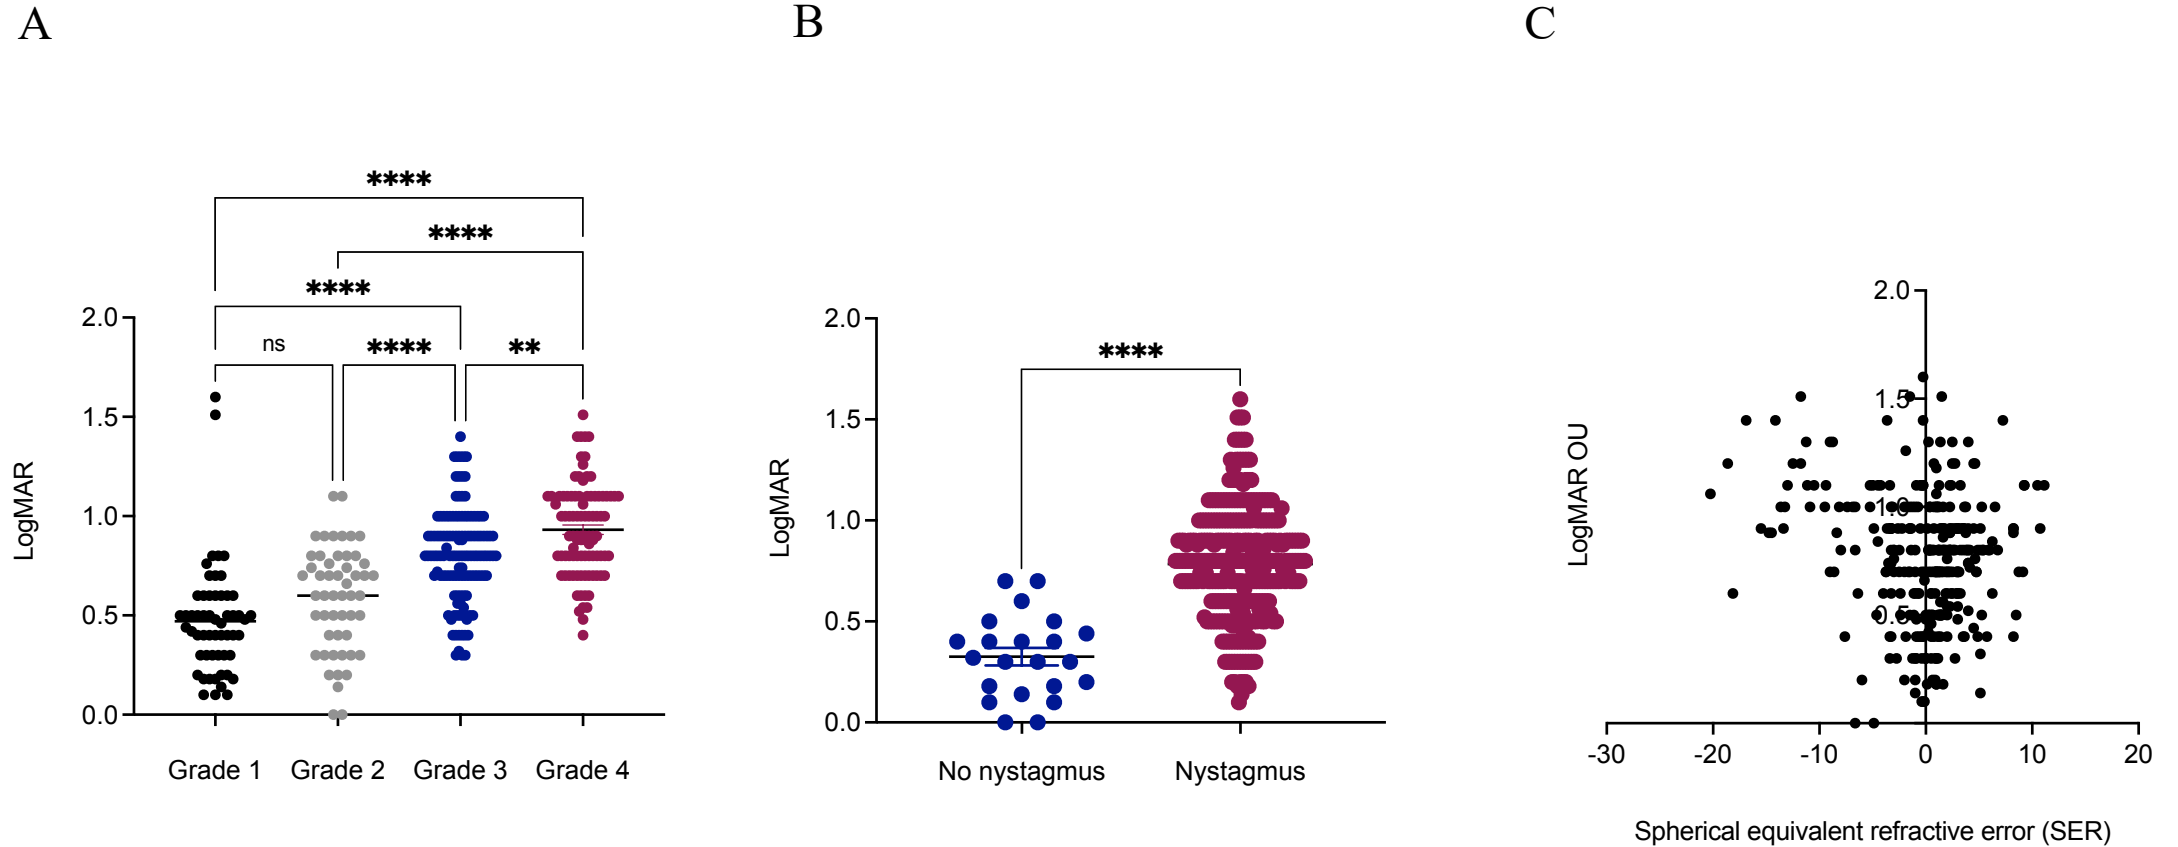

Supplement: mmc1.pdf [file mmc1.pdf]
