# Supplementary material for: Investigating Determinants and Evaluating Deep Learning Training Approaches for Visual Acuity in Foveal Hypoplasia
Source: PubMed Central journal article supplement — Ophthalmol Sci. 2022 Sep 24;3(1):100225. doi: 10.1016/j.xops.2022.100225 (PMC9634033; doi:10.1016/j.xops.2022.100225), 2022-09-24

**Supplemental figure 2.** Spherical refractive error in individuals with albinism spectrum disorder by foveal hypoplasia grade (A), relative proportion of individuals in the albinism subgroup with vs without nystagmus (B). FH = foveal hypoplasia.

A

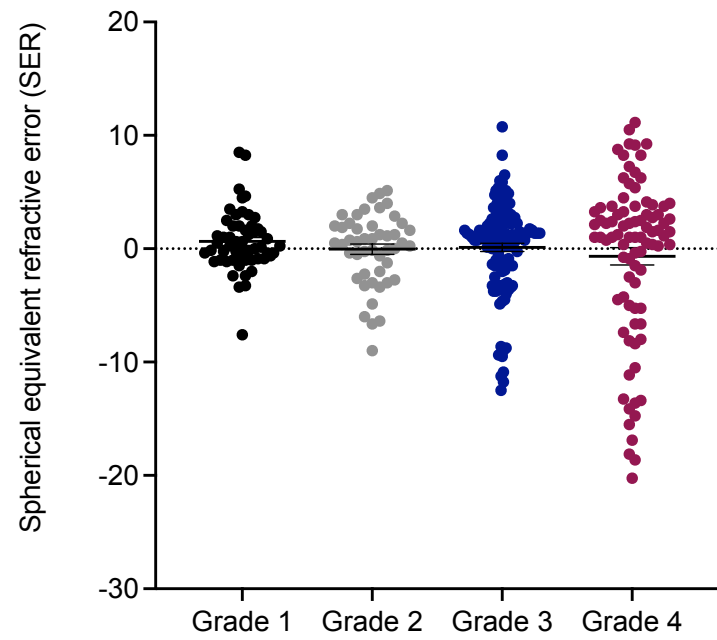

B

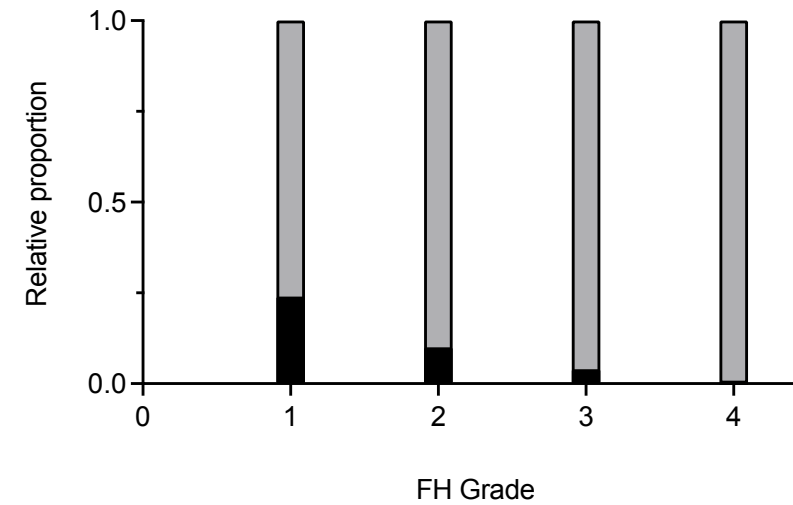

Supplement: mmc2.pdf [file mmc2.pdf]
