# Supplementary material for: Investigating Determinants and Evaluating Deep Learning Training Approaches for Visual Acuity in Foveal Hypoplasia
Source: PubMed Central journal article supplement — Ophthalmol Sci. 2022 Sep 24;3(1):100225. doi: 10.1016/j.xops.2022.100225 (PMC9634033; doi:10.1016/j.xops.2022.100225), 2022-09-24

**Supplemental figure 3.** Visual acuity of individuals with aniridia and *PAX6* spectrum disorder by foveal hypoplasia grade (A), nystagmus (B), and spherical equivalent refractive error (C). LogMAR = logarithm of the minimal angle of resolution; ns = not significant.

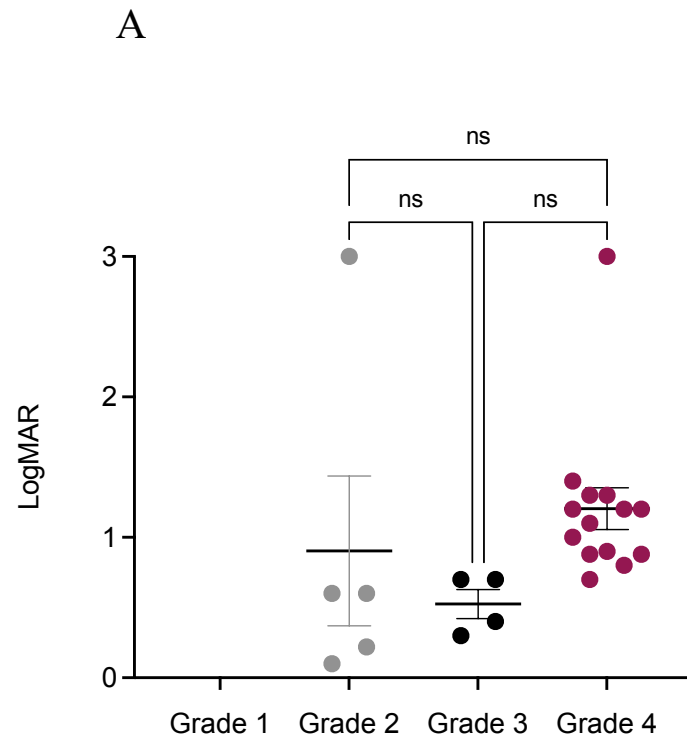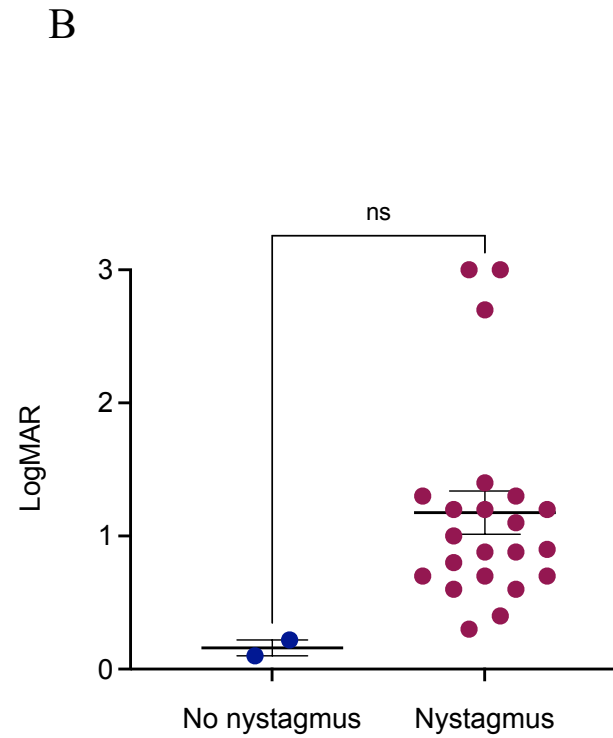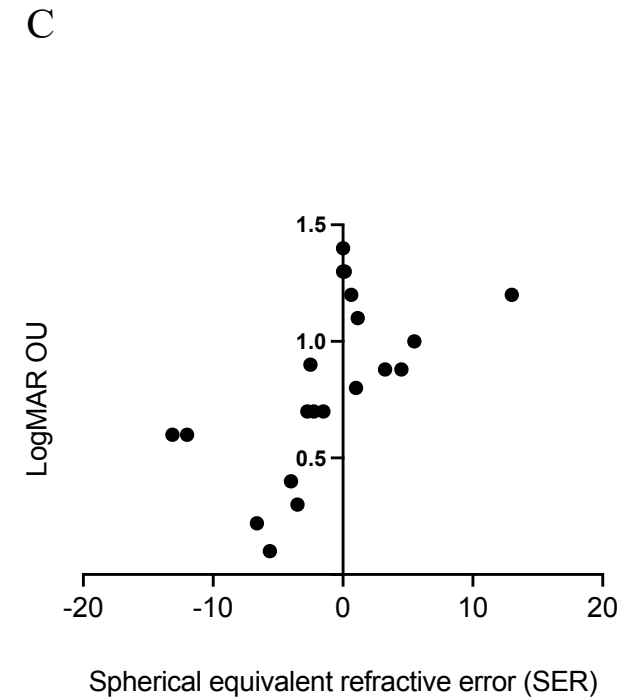

Supplement: mmc3.pdf [file mmc3.pdf]
