# Supplementary material for: Investigating Determinants and Evaluating Deep Learning Training Approaches for Visual Acuity in Foveal Hypoplasia
Source: PubMed Central journal article supplement — Ophthalmol Sci. 2022 Sep 24;3(1):100225. doi: 10.1016/j.xops.2022.100225 (PMC9634033; doi:10.1016/j.xops.2022.100225), 2022-09-24

**Supplemental figure 4.** Spherical equivalent refractive error of individuals with aniridia and *PAX6* spectrum disorder (A), relative proportion of number of individuals with vs without nystagmus by FH grade (B). FH = foveal hypoplasia; ns = not significant. \*\*\* $P \leq 0.001$ .

A

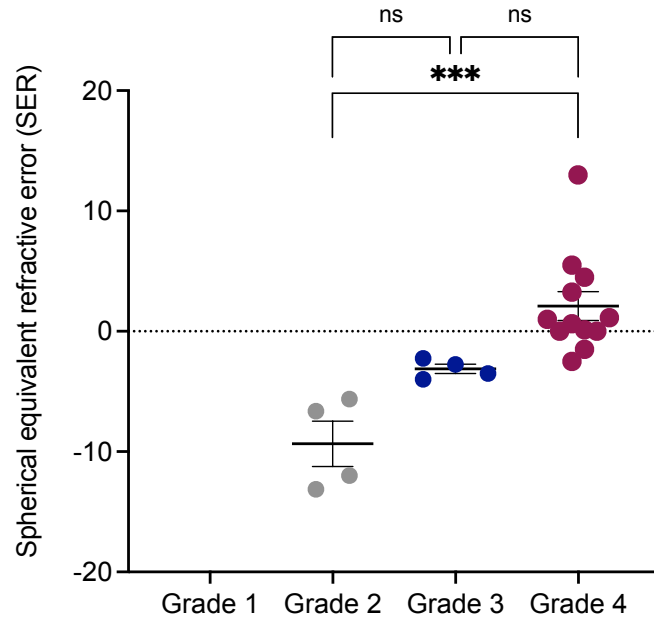

B

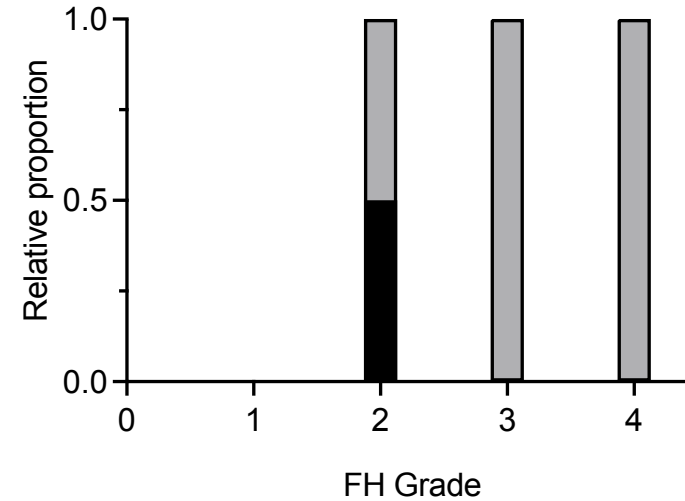

Supplement: mmc4.pdf [file mmc4.pdf]
