# Supplementary material for: Investigating Determinants and Evaluating Deep Learning Training Approaches for Visual Acuity in Foveal Hypoplasia
Source: PubMed Central journal article supplement — Ophthalmol Sci. 2022 Sep 24;3(1):100225. doi: 10.1016/j.xops.2022.100225 (PMC9634033; doi:10.1016/j.xops.2022.100225), 2022-09-24

**Supplemental Figure 5.** Occlusion maps showing locations having the most and least (red and green, respectively) contribution toward the true FH grading according to the neural network predictor.

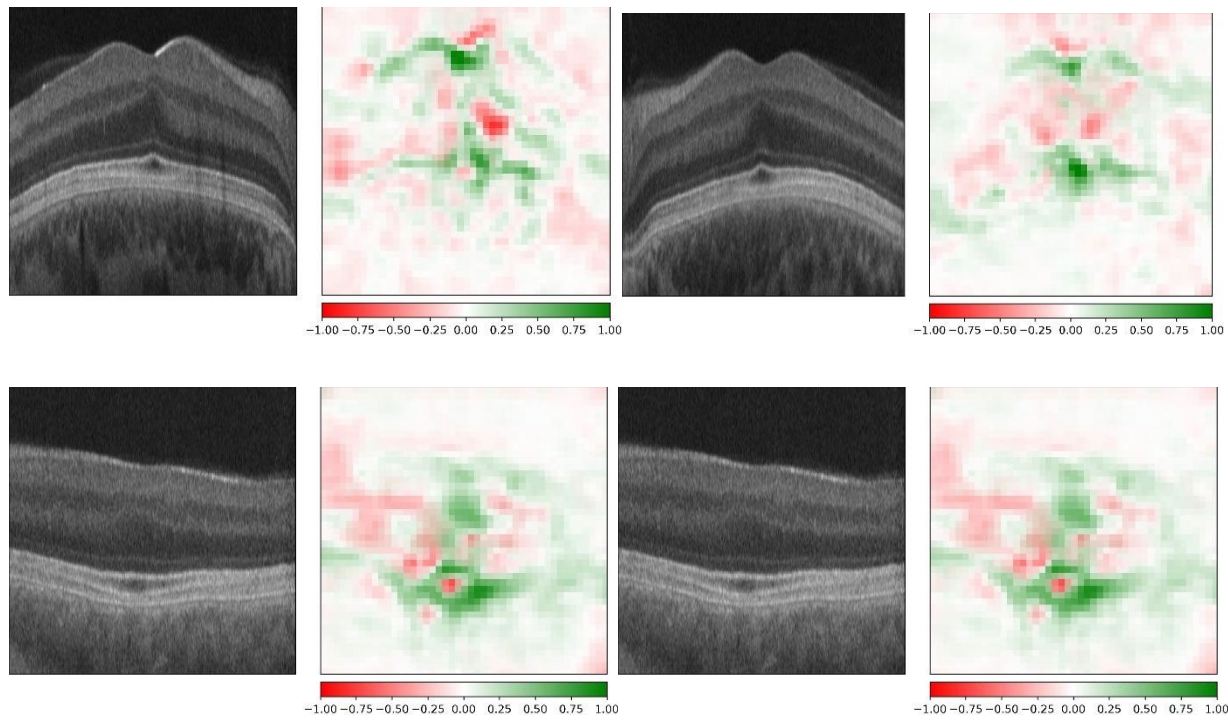

Supplement: mmc5.pdf [file mmc5.pdf]
