# Supplementary material for: Investigating Determinants and Evaluating Deep Learning Training Approaches for Visual Acuity in Foveal Hypoplasia
Source: PubMed Central journal article supplement — Ophthalmol Sci. 2022 Sep 24;3(1):100225. doi: 10.1016/j.xops.2022.100225 (PMC9634033; doi:10.1016/j.xops.2022.100225), 2022-09-24
Supplement: mmc7.pdf [file mmc7.pdf]

| Accuracy when treating FH grading as discrete value |        |       |       |       |              |
|-----------------------------------------------------|--------|-------|-------|-------|--------------|
| FH grading                                          | 1      | 2     | 3     | 4     | Average acc. |
| Image                                               | 96.70  | 23.30 | 55.00 | 77.80 | 63.20        |
| Image+GAN base                                      | 100.00 | 16.70 | 60.00 | 72.20 | 62.23        |
| Image+GAN55                                         | 100.00 | 33.30 | 65.00 | 72.00 | 67.58        |
| Image+GAN75                                         | 100.00 | 36.70 | 60.00 | 83.30 | 70.00        |
| Image+GAN90                                         | 100.00 | 30.00 | 60.00 | 83.30 | 68.33        |

**Supplementary Table 1.** Neural network predictor accuracy when treating FH grading as discrete value. Image: OCT images. GAN base: Type 1 fake OCT scans, where each fake image is generated for specific given FH grading. GAN55: Type 2 fake OCT scans where mix ratio is 55%; for example, a fake image would have 55% and 45% characteristic of FH grading 1 and 2. GAN75: Type 2 fake OCT scans where mix ratio is 75%. GAN90: Type 2 fake OCT scans where mix ratio is 90%.
